# Supplementary material for: Levonorgestre-lintrauterine system(LNG-IUS) plus Metformin compared with Megestrol Acetate (MA)plus Metformin as fertility-sparing treatment in patients with atypical endometrial hyperplasia and well differentiated endometrial cancer:a single-center retrospective study
Source: Research Square preprint supplement (doi:10.21203/rs.3.rs-6580786/v1), 2025-06-14
Supplement: Supplementary file 1 [file 3df6e3e19f9011bc62150dde.xlsx]

## Sheet: SCI内膜保育03.12数据
Patient	BMI	Age	Menostaxis	Increased menstrual flow	Decreased menstrual flow	Extended cycle	Dysmenorrhea	Parity	Parity	Hypertension	Diabetes	PCOS	Female reproductive system diseases	Hyperlipidemia	Anaemia	Ultrasound abnormality	MRI abnormality	Abnormal CT scan of the entire abdomen	FACT-G（0-108）	SAS	SDS	Pathology	Treatment Plan	Pregnancy after treatment	Complete remission	Complete relief time	Recurrence
1	27.12	44	0	0	0	0	0			0	0	0	0	0	0	0	0	0	67	37	36	A	0	0	2		0
2	31.25	27	0	0	1	0	0	2	0	1	1	0	1	0	0	0	0	0	64	39	38	E	1	0	1	12	1
3	23.05	42	0	0	0	0	0	1	0	0	0	0	1	0	0	0	0	0	64	40	38	A	0	0	2		0
4	27.51	42	0	0	0	0	0			0	0	0	0	1	0	0	0	0	64	38	36	A	0	0	1	6	1
5	31.25	27	0	0	0	0	0			0	0	0	0	0	0	0	0	0	73	36	33	A	1	1	1	3	0
6	22.31	28	1	0	0	1	1	0	0	0	0	0	0	0	0	0	0	0	67	38	41	A	1	1	1	3	0
7	18.94	28	0	0	0	0	0			0	0	0	0	0	0	0	0	0	64	38	38	A	1	1	1	3	0
8	36.7	28	0	0	0	0	0			0	0	0	0	1	0	1	0	0	61	45	40	E	1	0	1	6	1
9	26.6	40	0	0	0	0	0			0	0	0	1	0	0	0	0	0	60	43	45	E	0	0	3		0
10	31.25	40	0	0	0	0	0			0	0	0	0	1	0	1	0	0	60	44	46	A	0	0	2		0
11	29.02	38	0	0	0	0	1	2	0	0	0	0	1	0	0	0	0	0	72	36	37	A	0	1	1	3	0
12	28.84	29	0	0	0	0	0	0	0	0	0	0	0	0	0	0	0	0	65	38	35	A	1	1	1	3	0
13	23.44	38	0	0	0	0	1	0	0	0	0	0	0	0	0	0	0	0	70	40	35	A	0	0	1	9	1
14	24.44	38	0	0	0	0	0			0	0	0	1	0	0	0	0	0	70	37	34	A	0	0	1	6	1
15	29.38	38	0	0	0	0	0			0	0	0	1	1	0	0	0	0	61	35	39	E	0	0	3		0
16	26.57	29	0	0	0	0	0			0	0	0	0	0	0	0	0	0	70	38	36	A	1	1	1	3	0
17	80	38	0	0	0	1	0	1	0	0	1	0	0	0	0	1	0	0	60	45	48	E	0	0	3		0
18	15.42	37	0	0	0	0	0			0	0	0	0	0	0	0	0	0	68	36	37	A	0	0	1	6	0
19	19.77	37	0	0	0	1	1	1	1	0	0	0	1	0	0	0	0	0	68	38	37	A	0	0	1	9	0
20	33.12	37	0	0	0	0	0	2	0	1	0	0	0	0	0	0	0	0	68	38	39	A	0	0	2		0
21	28.04	37	0	0	0	0	0			0	0	0	0	0	0	0	0	0	72	38	38	A	0	1	1	3	0
22	25	36	0	0	0	0	0	1	0	0	0	0	1	0	0	0	0	0	67	39	37	A	0	0	1	9	0
23	28.44	29	0	0	0	0	0			0	0	0	0	1	0	0	0	0	63	38	37	E	1	0	1	12	0
24	29.02	30	0	0	0	0	0			0	0	0	1	0	0	0	0	0	68	38	35	A	1	1	1	6	0
25	25.39	36	0	0	0	0	0	0	0	0	0	0	1	0	0	0	0	0	67	37	39	A	0	0	1	9	0
26	31.53	35	0	0	0	0	0			0	0	0	0	1	0	0	0	0	62	43	45	E	0	0	2		0
27	25.16	35	0	0	0	0	0			0	0	0	0	0	0	0	0	0	62	40	39	E	0	0	2		0
28	27.74	35	0	0	0	0	0			0	0	0	0	0	0	0	0	0	68	34	37	A	0	0	1	9	1
29	26.84	35	0	0	0	0	0			0	0	0	0	1	0	0	0	0	67	40	39	A	0	0	1	6	0
30	24.09	34	0	0	0	0	0	0	0	0	0	0	1	0	0	0	1	0	69	47	48	A	0	0	2		0
31	23.53	31	0	0	0	0	0			0	0	0	0	0	0	0	0	0	68	38	37	A	1	1	1	3	0
32	24.99	34	1	0	1	0	0	0	0	0	0	0	1	0	0	0	0	0	69	35	39	A	0	0	1	12	0
33	29.55	31	0	0	0	0	0			0	0	0	0	1	0	0	0	0	68	42	37	A	1	0	1	6	0
34	39.86	34	1	1	0	1	1	0	0	0	1	1	0	1	0	0	0	0	62	44	42	A	0	0	3		0
35	33.06	34	0	0	0	0	0			0	0	0	0	0	0	0	0	0	67	34	38	A	0	0	2		0
36	29.3	33	0	0	0	0	0	0	0	1	1	0	0	0	0	0	0	0	70	40	37	A	0	0	1	6	1
37	33.06	31	0	0	0	0	0			0	0	0	0	0	0	0	1	0	62	45	40	E	1	0	2		0
38	18.75	33	0	0	0	0	0	0	0	0	0	0	0	0	0	0	0	0	68	32	38	A	0	1	1	6	0
39	32.03	33	0	0	0	1	0	0	0	1	0	1	0	0	0	0	1	0	62	43	41	E	0	0	3		0
40	22.65	32	0	0	1	1	1	0	0	0	0	0	1	0	0	0	0	1	63	44	40	A	1	1	1	3	0
41	29.04	32	0	0	0	0	0			0	0	0	0	0	0	0	0	0	69	38	37	A	1	1	1	3	0
42	31.89	33	0	0	0	0	0			0	0	0	0	1	0	0	0	0	69	32	39	A	0	0	1	6	1
43	32.77	33	0	0	0	0	0			0	0	0	0	1	0	0	0	0	67	33	38	A	0	0	1	12	1
44	24.2	33	0	0	0	0	0			0	0	0	0	1	0	1	1	1	61	45	45	E	0	0	4		0
45	30.48	32	0	0	0	0	0			0	0	0	0	0	0	0	1	0	60	43	42	A	0	0	3		0
46	31.22	34	0	0	0	0	0	1	0	0	0	0	0	0	0	0	0	0	69	38	37	A	1	0	1	9	0
47	31.22	32	1	1	0	0	0	2	1	0	0	0	1	0	0	0	0	0	68	32	38	A	0	0	2		0
48	35	32	0	1	0	1	0	0	0	0	0	0	1	1	0	0	0	0	63	42	40	A	0	0	2		0
49	30.04	32	0	1	0	1	0	1	1	0	0	1	1	0	0	0	0	0	69	32	39	A	0	2	1	9	1
50	41.52	34	0	1	0	0	0	0	0	1	0	0	0	0	0	0	0	0	69	38	37	A	1	0	1	12	0
51	31.3	34	0	0	0	0	0			0	0	0	0	0	0	1	0	0	60	45	40	E	1	0	4		0
52	27.1	34	0	0	0	0	0			0	0	0	1	1	0	0	0	0	68	38	37	A	1	0	1	3	0
53	27.34	35	0	0	0	0	0	0	0	0	0	1	0	0	1	0	0	0	60	37	41	A	1	0	3		0
54	29.59	32	0	0	0	0	0			0	0	0	0	0	0	0	0	0	73	39	38	A	0	1	1	3	0
55	31.58	32	0	0	0	0	0			0	0	0	0	0	0	0	0	0	62	38	39	E	0	0	4		0
56	25.82	31	0	0	0	1	0	0	0	1	1	0	0	0	1	0	1	0	63	43	45	E	0	2	1	12	1
57	31.25	31	0	1	0	1	1	0	0	0	0	0	1	0	0	0	0	0	73	39	39	A	0	0	2		0
58	20.94	31	0	0	0	0	0			0	0	0	0	0	0	0	0	0	68	37	38	A	0	0	1	9	0
59	30.12	30	1	0	0	0	0	0	0	0	0	0	0	0	0	0	0	0	71	38	31	A	0	1	1	3	0
60	25.4	30	0	0	0	0	0			0	0	0	0	0	0	0	0	0	65	37	33	A	0	0	1	12	0
61	22.58	30	0	0	0	0	0			0	0	0	0	0	0	0	0	0	73	36	32	A	0	1	1	3	0
62	27.89	35	1	1	0	0	0	4	2	0	0	0	1	0	0	0	0	0	62	39	44	A	1	0	2		0
63	34.77	35	0	0	0	0	0			0	0	0	0	0	0	0	0	0	62	38	37	A	1	0	1	3	0
64	29.69	36	0	0	0	0	0			0	0	0	0	0	0	0	0	0	70	38	37	A	1	0	1	3	0
65	35.69	36	0	0	0	0	0			0	0	0	0	0	0	1	0	0	62	40	41	E	1	0	2		0
66	29.76	30	0	0	0	0	0			0	0	0	0	0	0	0	0	0	72	36	31	A	0	1	1	3	0
67	23.2	30	0	0	0	0	0			0	0	0	0	0	0	0	0	0	65	35	34	A	0	0	1	12	0
68	21.3	37	0	0	0	0	0			0	0	0	0	0	0	0	0	0	69	38	37	A	1	1	1	9	0
69	26.89	37	0	0	0	0	0			0	0	0	0	0	0	0	1	0	62	38	40	A	1	1	1	3	0
70	30.2	39	0	0	0	0	0			0	0	0	0	0	0	0	0	0	63	39	44	A	1	0	1	6	0
71	31.23	30	0	0	0	0	0			0	0	0	0	1	0	1	0	0	60	47	46	A	0	0	4		0
72	34.4	40	0	0	0	0	0	2	1	0	0	0	1	0	0	0	0	0	64	43	40	A	1	0	1	6	0
73	23.11	40	0	0	0	0	0	1	0	0	0	0	1	0	0	0	0	0	64	39	42	A	1	1	1	3	0
74	37.97	30	0	0	0	0	0			0	0	0	0	1	0	0	0	0	65	36	32	A	0	0	2		0
75	25.59	29	1	0	0	1	0	0	0	0	0	1	1	0	0	0	0	0	62	41	42	A	0	0	2		0
76	24.44	28	0	0	0	0	0			0	0	0	0	0	0	0	0	0	66	37	33	A	0	0	1	6	0
77	24.67	28	0	0	0	1	0	1	0	0	0	0	0	0	0	0	1	0	70	36	32	A	0	1	1	3	0
78	24.84	40	0	0	0	0	0			0	0	0	1	1	0	0	0	0	69	38	37	A	1	0	1	9	0
79	32.05	23	0	0	0	1	0	0	0	0	0	1	0	0	0	0	0	0	62	40	41	A	0	0	2		0
80	35.75	41	0	0	0	0	0	4	0	1	0	0	1	0	0	0	0	0	60	37	40	A	1	2	1	3	0
81	22.86	42	0	0	0	0	0			0	0	0	0	0	0	0	0	0	69	36	36	A	1	1	1	3	0
82	28.6	43	0	0	0	0	0			0	0	0	0	0	0	0	1	0	69	37	36	A	1	0	1	6	0

## Sheet: 完全缓解复发
	BMI	BMI≥30为1＜为0	年龄	年龄＞35岁为1，≤35岁为0	经期延长	经量增多	经量减少	周期延长	痛经	孕	产	BP	CLU	PCOS	卵巢	血脂	HB	超声	MRI	全腹	FACT-G（0-108）	SAS	SDS	病理	ER	PR	治疗方案1环0药	6m	9m	12m	18m	24m	治疗后妊娠	妊娠1非妊娠0	流产	活产	完全缓解	完全缓解1非完全缓解0	完全缓解时间	部分缓解	病情稳定	病情进展	复发率
赵鑫	31.25	1	27	0	0	0	1	0	0	2	0	1	1	0	1	0	0	0	0	0	64	39	38	E			1						0	0			1	1	12				1
王晶	27.51	0	42	1	0	0	0	0	0			0	0	0	0	1	0	0	0	0	64	38	36	A			0						0	0			1	1	6				1
赵爽	31.25	1	27	0	0	0	0	0	0			0	0	0	0	0	0	0	0	0	73	36	33	A			1						1	1		1	1	1	3				0
王妍	22.31	0	28	0	1	0	0	1	1	0	0	0	0	0	0	0	0	0	0	0	67	38	41	A			1						1	1			1	1	3				0
李冬梅	18.94	0	28	0	0	0	0	0	0			0	0	0	0	0	0	0	0	0	64	38	38	A			1						1	1			1	1	3				0
王雪	36.7	1	28	0	0	0	0	0	0			0	0	0	0	1	0	1	0	0	61	45	40	E			1			未			0	0			1	1	6		1		1
王淑花	29.02	0	38	1	0	0	0	0	1	2	0	0	0	0	1	0	0	0	0	0	72	36	37	A			0						1	1		1	1	1	3				0
陆莹	28.84	0	29	0	0	0	0	0	0	0	0	0	0	0	0	0	0	0	0	0	65	38	35	A			1						1	1			1	1	3				0
王红艳	23.44	0	38	1	0	0	0	0	1	0	0	0	0	0	0	0	0	0	0	0	70	40	35	A			0						0	0			1	1	9				1
代芳	24.44	0	38	1	0	0	0	0	0			0	0	0	1	0	0	0	0	0	70	37	34	A			0						0	0			1	1	6				1
李丹丹	26.57	0	29	0	0	0	0	0	0			0	0	0	0	0	0	0	0	0	70	38	36	A			1						1	1		1	1	1	3				0
王晓晨	15.42	0	37	1	0	0	0	0	0			0	0	0	0	0	0	0	0	0	68	36	37	A			0						0	0			1	1	6				0
王新	19.77	0	37	1	0	0	0	1	1	1	1	0	0	0	1	0	0	0	0	0	68	38	37	A			0						0	0			1	1	9				0
孙莹	28.04	0	37	1	0	0	0	0	0			0	0	0	0	0	0	0	0	0	72	38	38	A			0						1	1		1	1	1	3				0
李新	25	0	36	1	0	0	0	0	0	1	0	0	0	0	1	0	0	0	0	0	67	39	37	A			0						0	0			1	1	9				0
阎冬雪	28.44	0	29	0	0	0	0	0	0			0	0	0	0	1	0	0	0	0	63	38	37	E			1						0	0			1	1	12				0
孙月	29.02	0	30	0	0	0	0	0	0			0	0	0	1	0	0	0	0	0	68	38	35	A			1						1	1		1	1	1	6				0
刘佳	25.39	0	36	1	0	0	0	0	0	0	0	0	0	0	1	0	0	0	0	0	67	37	39	A			0						0	0			1	1	9				0
邵天岩	27.74	0	35	0	0	0	0	0	0			0	0	0	0	0	0	0	0	0	68	34	37	A			0						0	0			1	1	9				1
郭丹	26.84	0	35	0	0	0	0	0	0			0	0	0	0	1	0	0	0	0	67	40	39	A			0						0	0			1	1	6				0
王喻	23.53	0	31	0	0	0	0	0	0			0	0	0	0	0	0	0	0	0	68	38	37	A			1						1	1			1	1	3				0
孙莹	24.99	0	34	0	1	0	1	0	0	0	0	0	0	0	1	0	0	0	0	0	69	35	39	A			0						0	0			1	1	12				0
刘晓蕊	29.55	0	31	0	0	0	0	0	0			0	0	0	0	1	0	0	0	0	68	42	37	A			1						0	0			1	1	6				0
张巍	29.3	0	33	0	0	0	0	0	0	0	0	1	1	0	0	0	0	0	0	0	70	40	37	A			0	1					0	0			1	1	6				1
王欢	18.75	0	33	0	0	0	0	0	0	0	0	0	0	0	0	0	0	0	0	0	68	32	38	A			0						1	1		1	1	1	6				0
叶红佳	22.65	0	32	0	0	0	1	1	1	0	0	0	0	0	1	0	0	0	0	1	63	44	40	A			1						1	1			1	1	3				0
李雪瑶	29.04	0	32	0	0	0	0	0	0			0	0	0	0	0	0	0	0	0	69	38	37	A			1						1	1			1	1	3				0
侯文	31.89	1	33	0	0	0	0	0	0			0	0	0	0	1	0	0	0	0	69	32	39	A			0						0	0			1	1	6				1
赵茜茜	32.77	1	33	0	0	0	0	0	0			0	0	0	0	1	0	0	0	0	67	33	38	A			0						0	0			1	1	12				1
解娇	31.22	1	34	0	0	0	0	0	0	1	0	0	0	0	0	0	0	0	0	0	69	38	37	A			1						0	0			1	1	9				0
张雪	30.04	1	32	0	0	1	0	1	0	1	1	0	0	1	1	0	0	0	0	0	69	32	39	A			0						2	1	2		1	1	9				1
张耀瑜	41.52	0	34	0	0	1	0	0	0	0	0	1	0	0	0	0	0	0	0	0	69	38	37	A			1						0	0			1	1	12				0
从崇	27.1	0	34	0	0	0	0	0	0			0	0	0	1	1	0	0	0	0	68	38	37	A			1						0	0			1	1	3				0
徐贤伢	29.59	0	32	0	0	0	0	0	0			0	0	0	0	0	0	0	0	0	73	39	38	A			0						1	1		1	1	1	3				0
师诗	25.82	0	31	0	0	0	0	1	0	0	0	1	1	0	0	0	1	0	1	0	63	43	45	E			0						2	1	2		1	1	12				1
高珊珊	20.94	0	31	0	0	0	0	0	0			0	0	0	0	0	0	0	0	0	68	37	38	A			0						0	0			1	1	9				0
王琦	30.12	1	30	0	1	0	0	0	0	0	0	0	0	0	0	0	0	0	0	0	71	38	31	A			0						1	1		1	1	1	3				0
包会娣	25.4	0	30	0	0	0	0	0	0			0	0	0	0	0	0	0	0	0	65	37	33	A			0						0	0			1	1	12				0
李慧	22.58	0	30	0	0	0	0	0	0			0	0	0	0	0	0	0	0	0	73	36	32	A			0						1	1		1	1	1	3				0
王欢	34.77	1	35	0	0	0	0	0	0			0	0	0	0	0	0	0	0	0	62	38	37	A			1						0	0			1	1	3				0
王丽华	29.69	0	36	1	0	0	0	0	0			0	0	0	0	0	0	0	0	0	70	38	37	A	1	1	1						0	0			1	1	3				0
王晶	29.76	0	30	0	0	0	0	0	0			0	0	0	0	0	0	0	0	0	72	36	31	A			0						1	1		1	1	1	3				0
甘雪婷	23.2	0	30	0	0	0	0	0	0			0	0	0	0	0	0	0	0	0	65	35	34	A			0						0	0			1	1	12				0
杨婉	21.3	0	37	1	0	0	0	0	0			0	0	0	0	0	0	0	0	0	69	38	37	A			1						1	1			1	1	9				0
黄庆玲	26.89	0	37	1	0	0	0	0	0			0	0	0	0	0	0	0	1	0	62	38	40	A			1						1	1			1	1	3				0
陈晶	30.2	1	39	1	0	0	0	0	0			0	0	0	0	0	0	0	0	0	63	39	44	A			1						0	0			1	1	6				0
李俣霏	34.4	1	40	1	0	0	0	0	0	2	1	0	0	0	1	0	0	0	0	0	64	43	40	A			1						0	0			1	1	6				0
邹晓丹	23.11	0	40	1	0	0	0	0	0	1	0	0	0	0	1	0	0	0	0	0	64	39	42	A			1						1	1			1	1	3				0
张珺	24.44	0	28	0	0	0	0	0	0			0	0	0	0	0	0	0	0	0	66	37	33	A			0						0	0			1	1	6				0
杨兰惠	24.67	0	28	0	0	0	0	1	0	1	0	0	0	0	0	0	0	0	1	0	70	36	32	A			0						1	1		1	1	1	3				0
李宇娜	24.84	0	40	1	0	0	0	0	0			0	0	0	1	1	0	0	0	0	69	38	37	A			1						0	0			1	1	9				0
周静	35.75	1	41	1	0	0	0	0	0	4	0	1	0	0	1	0	0	0	0	0	60	37	40	A			1						2	1	2		1	1	3				0
王岩	22.86	0	42	1	0	0	0	0	0			0	0	0	0	0	0	0	0	0	69	36	36	A			1						1	1			1	1	3				0
刘明霞	28.6	0	43	1	0	0	0	0	0			0	0	0	0	0	0	0	1	0	69	37	36	A			1						0	0			1	1	6				0
